# Supplementary material for: Occupation, work-related contact and SARS-CoV-2 anti-nucleocapsid serological status: findings from the Virus Watch prospective cohort study
Source: HighWire-hosted journal article supplement (doi:10.1136/oemed-2021-107920), 2022-04-21
Supplement: oemed-2021-107920supp001_data_supplement.pdf [file oemed-2021-107920supp001_data_supplement.pdf]

## Supplementary Materials

Supplementary Figure S1. Total Effect and Mediation Models

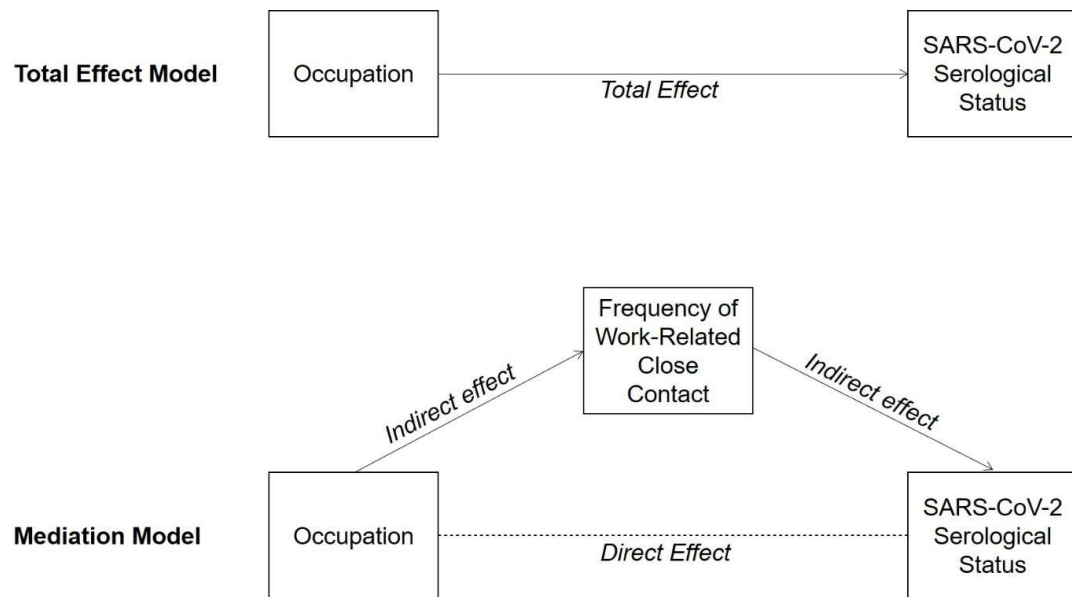

### Discussion of Mediation Models

Total-effect models differ fundamentally from mediation models, and the absence of a total effect does not necessarily indicate the absence of theoretically-sound mediated effects, though these should be interpreted cautiously<sup>1,2</sup>. Following Zhao et al.'s typology of mediation effects<sup>1</sup>, our findings suggested indirect-only mediation for all occupational groups except for healthcare workers and indoor trade, process and plant occupations. Direct effects were observed in the mediation model for the latter groups, consistent with complementary mediation<sup>36</sup> and suggesting the presence of further indirect effects unaccounted for in the model.

- 1 Zhao X, Lynch JG, Chen Q. Reconsidering Baron and Kenny: Myths and Truths about Mediation Analysis. *J Consum Res* 2010; **37**: 197–206.
- 2 Preacher KJ. Advances in mediation analysis: a survey and synthesis of new developments. *Annu Rev Psychol* 2015; **66**: 825–52.

Supplementary Figure S2. Directed Acyclic Graph for Estimating Total and Contact-Mediated Effect of Occupation on SARS-CoV-2 Infection Risk

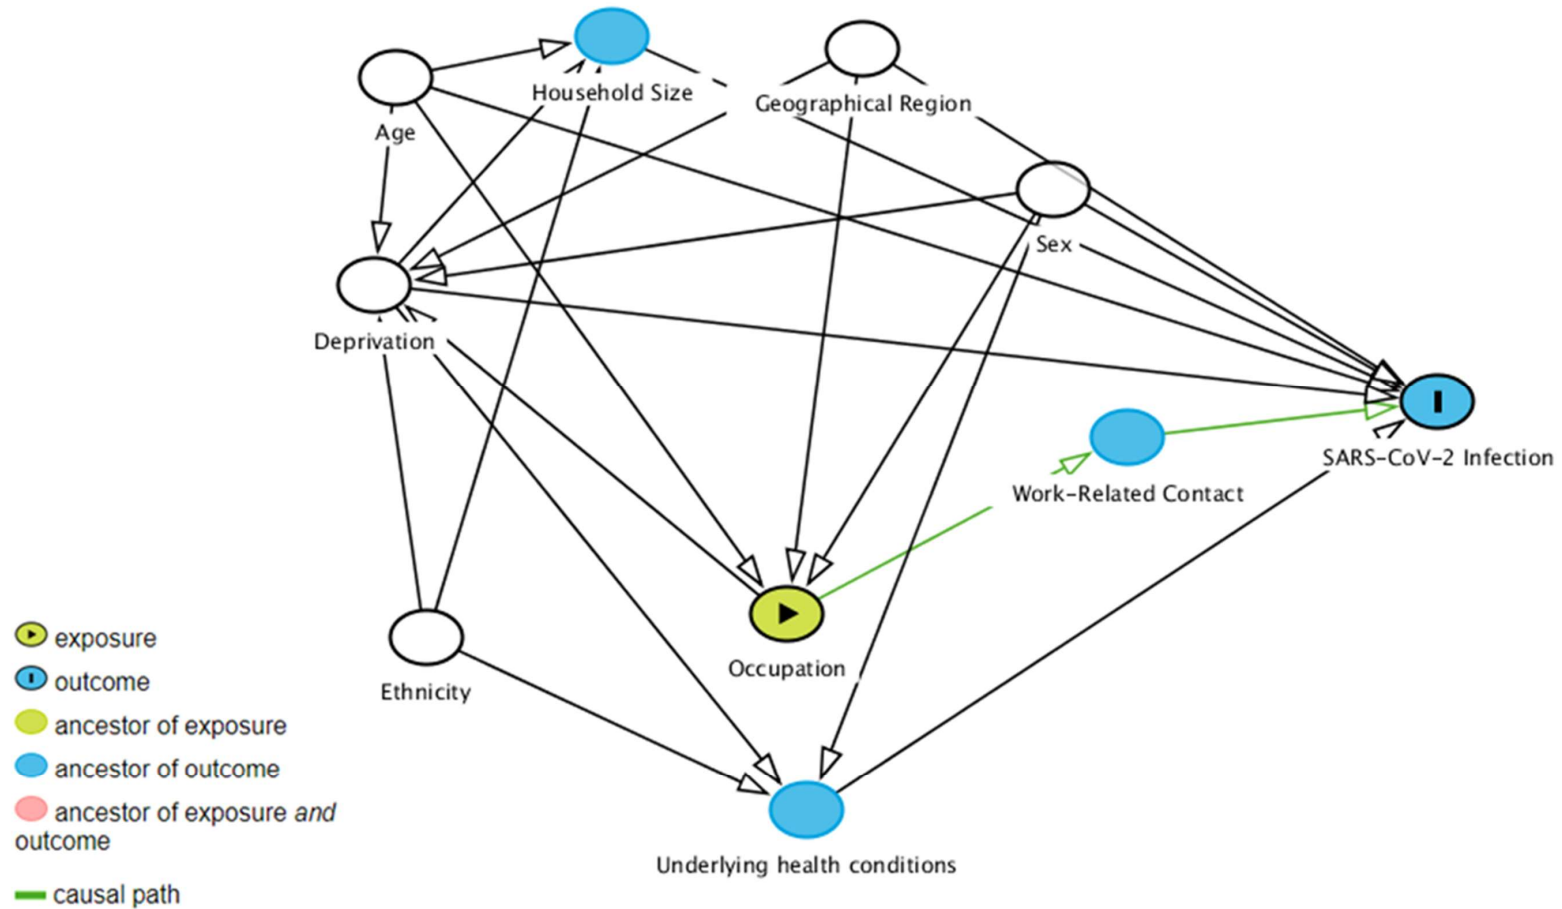

### Occupational Classification

UK Standard Occupational Classification 2020 (SOC-2020) codes are grouped within minor, sub-major, and major categories based on occupation-related skill level and skill specialisation. As these groupings combine occupations that take place in varying environments and with different work-related behaviour/public exposure patterns, we categorised SOC-2020 codes into the following occupational categories to reflect these factors while retaining, where possible, the occupational groups outlined by ONS: administrative and secretarial occupations; healthcare occupations; indoor trade, process & plant occupations; leisure and personal service occupations; managers, directors, and senior officials; outdoor trade occupations; sales and customer service occupations; social care and community protective services; teaching education and childcare occupations; transport and mobile machine operatives; and other professional and associate occupations (professional and associate professional occupations excluding healthcare, teaching, and social care/community protective services).

Supplementary Table S1 lists UK 2020 SOC codes included within each occupational category, and the most prevalent SOC-2020-defined occupations within each category.

**Supplementary Table S1. UK Standard Occupational Classification 2020 (SOC-2020) Codes within Virus Watch Occupational Categories**

| Virus Watch Occupational Category          | UK SOC-2020 Codes                                                                 | Three Most Prevalent Occupations* (SOC-2020 Unit Group)                                                                                                                                                                                             |
|--------------------------------------------|-----------------------------------------------------------------------------------|-----------------------------------------------------------------------------------------------------------------------------------------------------------------------------------------------------------------------------------------------------|
| Administrative & Secretarial Occupations   | 4111-4217, 9211, 9219, 9233                                                       | <ol style="list-style-type: none"> <li>1. Other administrative occupations n.e.c. (25%, n= 122)</li> <li>2. Book-keepers, payroll managers, and wage clerks (11%, n=55)</li> <li>3. Personal assistants and other secretaries (7%, n=34)</li> </ol> |
| Healthcare Occupations                     | 2211-2259, 3211-3219, 3240, 6131-6133                                             | <ol style="list-style-type: none"> <li>1. Other nursing professionals (22%, n=73)</li> <li>2. Generalist medical practitioners (10%, n=33)</li> <li>3. Nursing auxiliaries and assistants (7%, n=24)</li> </ol>                                     |
| Indoor Trades, Process & Plant Occupations | 5211-5250, 5315-5317, 5321-5323, 5411-5449, 8111-8149, 8160, 9131-9139, 9241-9259 | <ol style="list-style-type: none"> <li>1. Warehouse operatives (12%, n=28)</li> <li>2. Metalworking production and maintenance fitters (10%, n=23)</li> </ol>                                                                                       |

|                                               |                                                                                      |                                                                                                                                                                                                         |
|-----------------------------------------------|--------------------------------------------------------------------------------------|---------------------------------------------------------------------------------------------------------------------------------------------------------------------------------------------------------|
|                                               |                                                                                      | 3. Electricians and electrical fitters (8%, n=20)                                                                                                                                                       |
| Leisure & Personal Service Occupations        | 1221-1225, 1252, 1253, 1256, 1257, 6121, 6129, 6211-6250, 9221-9229, 9231, 9261-9269 | 1. Cleaners and domestics (14%, n=21)<br>2. Hairdressers and barbers (10%, n=15)<br>3. Animal care service occupations n.e.c. (7%, n=10)                                                                |
| Managers, Directors & Senior Officials        | 1111-1161, 1171,1172, 1211, 1212, 1231, 1241-1243, 1251, 1254, 1255, 1258, 1259      | 1. Financial managers and directors (18%, n=59)<br>2. Functional managers and directors n.e.c. (10%, n=31)<br>3. Human resource managers and directors (9%, n=30)                                       |
| Other Professionals & Associate Professionals | 2111-2162, 2411-2455, 2471-2494, 3111-3133, 3411-3582                                | 1. Programmers and software development professionals (6%, n=78)<br>2. Management consultants and business analysts (4%, n=56)<br>3. Business and financial project management professionals (4%, n=52) |
| Outdoor Trade Occupations                     | 5111-5119, 5311-5314, 5319, 5330, 8151-8159, 9111- 9129                              | 1. Gardeners and landscape gardeners (20%, n=17)<br>2. Farmers (18%, n=15)<br>3. Construction and building trades n.e.c. (14%, n=12)                                                                    |
| Sales & Customer Service Occupations          | 7111-7220                                                                            | 1. Sales and retail assistants (37%, n=62)<br>2. Sales supervisors - retail and wholesale (12%, n=20)<br>3. Customer service occupations n.e.c. (10%, n=17)                                             |

|                                             |                                                                         |                                                                                                                                                                                                                                     |
|---------------------------------------------|-------------------------------------------------------------------------|-------------------------------------------------------------------------------------------------------------------------------------------------------------------------------------------------------------------------------------|
| Social Care & Community Protective Services | 1162, 1163, 1232, 2461-2469, 3221-3229, 3311-3319, 6134-6138, 6311-6312 | <ol style="list-style-type: none"> <li>Care workers and home carers (23%, n=43)</li> <li>Welfare and housing associate professionals n.e.c. (12%, n=22)</li> <li>Social workers (9%, n=16)</li> </ol>                               |
| Teaching, Education & Childcare Occupations | 1233, 2311-2329, 3231, 3232, 6111-6117, 9232                            | <ol style="list-style-type: none"> <li>Secondary education teaching professionals (14%, n=59)</li> <li>Higher education teaching professionals (13%, n=58)</li> <li>Education advisers and school inspectors (13%, n=56)</li> </ol> |
| Transport & Mobile Machine Operatives       | 8211-8239                                                               | <ol style="list-style-type: none"> <li>Large goods vehicle drivers (22%, n=17)</li> <li>Driving instructors (14%, n=11)</li> <li>Bus and coach drivers (13%, n=10)</li> </ol>                                                       |

**Abbreviations:** n.e.c. = not elsewhere classified; \* Limited to three most prevalent occupations per category to prevent declarative disclosure and due to large number of occupations across sample (n=371)

**Supplementary Table S2. SARS-CoV-2 Serological Status by Occupation**

| <b>Characteristic</b>                       | <b>Negative, N =<br/>3,317<sup>1</sup></b> | <b>Positive, N =<br/>458<sup>1</sup></b> |
|---------------------------------------------|--------------------------------------------|------------------------------------------|
| Occupation                                  |                                            |                                          |
| Administrative & Secretarial                | 441.0 (88.9%)                              | 55.0 (11.1%)                             |
| Healthcare                                  | 262.0 (80.1%)                              | 65.0 (19.9%)                             |
| Indoor Trades, Process & Plant              | 203.0 (84.2%)                              | 38.0 (15.8%)                             |
| Leisure & Personal Service                  | 122.0 (83.6%)                              | 24.0 (16.4%)                             |
| Managers, Directors & Senior Officials      | 286.0 (89.7%)                              | 33.0 (10.3%)                             |
| Other professional & associate              | 1,173.0 (90.2%)                            | 128.0 (9.8%)                             |
| Outdoor Trades                              | 73.0 (85.9%)                               | 12.0 (14.1%)                             |
| Sales & Customer Service                    | 148.0 (87.6%)                              | 21.0 (12.4%)                             |
| Social Care & Community Protective Services | 163.0 (88.1%)                              | 22.0 (11.9%)                             |
| Teaching, Education & Childcare             | 382.0 (88.8%)                              | 48.0 (11.2%)                             |
| Transport & Mobile Machine                  | 64.0 (84.2%)                               | 12.0 (15.8%)                             |

<sup>1</sup>n (row %)

**Supplementary Table S3. Frequency of Workplace Close Contact by Seropositivity and Occupation**

| Characteristic                 |                                             | Daily, N = 721 <sup>1</sup> | Intermediate, N = 950 <sup>1</sup> | Never, N = 2,104 <sup>1</sup> |
|--------------------------------|---------------------------------------------|-----------------------------|------------------------------------|-------------------------------|
| Occupation                     | Other professional & associate              | 85.0 (6.5%)                 | 242.0 (18.6%)                      | 974.0 (74.9%)                 |
|                                | Administrative & Secretarial                | 64.0 (12.9%)                | 125.0 (25.2%)                      | 307.0 (61.9%)                 |
|                                | Healthcare                                  | 151.0 (46.2%)               | 106.0 (32.4%)                      | 70.0 (21.4%)                  |
|                                | Indoor Trades, Process & Plant              | 82.0 (34.0%)                | 82.0 (34.0%)                       | 77.0 (32.0%)                  |
|                                | Leisure & Personal Service                  | 40.0 (27.4%)                | 45.0 (30.8%)                       | 61.0 (41.8%)                  |
|                                | Managers, Directors & Senior Officials      | 45.0 (14.1%)                | 66.0 (20.7%)                       | 208.0 (65.2%)                 |
|                                | Outdoor Trades                              | 20.0 (23.5%)                | 34.0 (40.0%)                       | 31.0 (36.5%)                  |
|                                | Sales & Customer Service                    | 38.0 (22.5%)                | 51.0 (30.2%)                       | 80.0 (47.3%)                  |
|                                | Social Care & Community Protective Services | 43.0 (23.2%)                | 66.0 (35.7%)                       | 76.0 (41.1%)                  |
|                                | Teaching, Education & Childcare             | 119.0 (27.7%)               | 112.0 (26.0%)                      | 199.0 (46.3%)                 |
|                                | Transport & Mobile Machine                  | 34.0 (44.7%)                | 21.0 (27.6%)                       | 21.0 (27.6%)                  |
| Anti-Nucleocapsid Seropositive | Yes                                         | 123 (17.1%)                 | 125 (13.2%)                        | 210 (10.0%)                   |
|                                | No                                          | 598 (82.9%)                 | 825 (86.8%)                        | 1894 (90.0%)                  |

<sup>1</sup>n (%)



**Supplementary Table S4. Odds Ratios for Total, Indirect, and Direct Effects**

|                                             | Total |            |          | Indirect |            |          | Direct |            |          |
|---------------------------------------------|-------|------------|----------|----------|------------|----------|--------|------------|----------|
|                                             | OR    | 95% CI     | <i>p</i> | OR       | 95% CI     | <i>p</i> | OR     | 95% CI     | <i>p</i> |
| Other Professional & Associate              | REF   | REF        | REF      | REF      | REF        | REF      | REF    | REF        | REF      |
| Administrative & Secretarial                | 1.29  | 0.89, 1.85 | 0.18     | 1.04     | 1.01, 1.08 | 0.02     | 1.23   | 0.86, 1.76 | 0.25     |
| Healthcare                                  | 2.46  | 1.80, 3.37 | <0.001   | 1.23     | 1.08, 1.41 | 0.002    | 2.00   | 1.47, 2.72 | <0.001   |
| Indoor Trades, Process & Plant              | 2.07  | 1.40, 3.07 | <0.001   | 1.17     | 1.05, 1.31 | 0.004    | 1.77   | 1.21, 2.59 | 0.003    |
| Leisure & Personal Service                  | 1.80  | 1.12, 2.90 | 0.02     | 1.14     | 1.03, 1.25 | 0.01     | 1.58   | 1.02, 2.46 | 0.04     |
| Managers, Directors & Senior Officials      | 1.17  | 0.74, 1.85 | 0.50     | 1.04     | 1.00, 1.08 | 0.03     | 1.13   | 0.72, 1.77 | 0.61     |
| Outdoor Trades                              | 1.61  | 0.72, 3.56 | 0.24     | 1.13     | 1.03, 1.23 | 0.01     | 1.42   | 0.65, 3.13 | 0.38     |
| Sales & Customer Service                    | 1.53  | 0.86, 2.70 | 0.15     | 1.11     | 1.03, 1.19 | 0.01     | 1.38   | 0.78, 2.45 | 0.27     |
| Social Care & Community Protective Services | 1.41  | 0.87, 2.29 | 0.17     | 1.12     | 1.04, 1.21 | 0.004    | 1.26   | 0.78, 2.04 | 0.35     |
| Teaching, Education & Childcare             | 1.17  | 0.88, 1.57 | 0.29     | 1.12     | 1.03, 1.23 | 0.01     | 1.04   | 0.78, 1.40 | 0.78     |
| Transport & Mobile Machine                  | 2.17  | 1.18, 3.99 | 0.01     | 1.23     | 1.06, 1.42 | 0.01     | 1.77   | 0.96, 3.26 | 0.07     |

**Supplementary Table S5. Frequency of Exposure to Poorly Ventilated Workplace by Occupation**

| Characteristic                              | Daily, N = 408 <sup>1</sup> | Intermediate, N = 508 <sup>1</sup> | Never, N = 2,835 <sup>1</sup> |
|---------------------------------------------|-----------------------------|------------------------------------|-------------------------------|
| Other professional & associate              | 128.0 (9.9%)                | 138.0 (10.7%)                      | 1,029.0 (79.5%)               |
| Administrative & Secretarial                | 55.0 (11.2%)                | 58.0 (11.8%)                       | 380.0 (77.1%)                 |
| Healthcare                                  | 57.0 (17.6%)                | 74.0 (22.9%)                       | 192.0 (59.4%)                 |
| Indoor Trades, Process & Plant              | 30.0 (12.6%)                | 45.0 (18.9%)                       | 163.0 (68.5%)                 |
| Leisure & Personal Service                  | 23.0 (16.1%)                | 18.0 (12.6%)                       | 102.0 (71.3%)                 |
| Managers, Directors & Senior Officials      | 25.0 (7.9%)                 | 27.0 (8.5%)                        | 265.0 (83.6%)                 |
| Outdoor Trades                              | 2.0 (2.4%)                  | 11.0 (12.9%)                       | 72.0 (84.7%)                  |
| Sales & Customer Service                    | 23.0 (13.7%)                | 30.0 (17.9%)                       | 115.0 (68.5%)                 |
| Social Care & Community Protective Services | 19.0 (10.3%)                | 31.0 (16.8%)                       | 135.0 (73.0%)                 |
| Teaching, Education & Childcare             | 35.0 (8.2%)                 | 69.0 (16.1%)                       | 325.0 (75.8%)                 |
| Transport & Mobile Machine                  | 11.0 (14.7%)                | 7.0 (9.3%)                         | 57.0 (76.0%)                  |
| Anti-Nucleocapsid Seropositive              |                             |                                    |                               |
| Yes                                         | 75 (18.4%)                  | 67 (13.2%)                         | 312 (11.0%)                   |
| No                                          | 333 (81.6%)                 | 441 (86.8%)                        | 2523 (89.0%)                  |

<sup>1</sup>n (%)

**Supplementary Table S6. Odds Ratios for Frequency of Exposure to Poorly Ventilated Workplace by Occupation**

|                                             | OR   | 95% CI    | <i>p</i> |
|---------------------------------------------|------|-----------|----------|
| Other professional & associate              | REF  | REF       | REF      |
| Administrative & Secretarial                | 1.15 | 0.90,1.48 | 0.26     |
| Healthcare                                  | 2.50 | 1.94,3.22 | <0.001   |
| Indoor Trades, Process & Plant              | 1.71 | 1.27,2.30 | <0.001   |
| Leisure & Personal Service                  | 1.60 | 1.09,2.35 | 0.02     |
| Managers, Directors & Senior Officials      | 0.76 | 0.55,1.05 | 0.10     |
| Outdoor Trades                              | 0.66 | 0.36,1.20 | 0.17     |
| Sales & Customer Service                    | 1.74 | 1.23,2.45 | 0.002    |
| Social Care & Community Protective Services | 1.38 | 0.98,1.95 | 0.07     |
| Teaching, Education & Childcare             | 1.18 | 0.92,1.53 | 0.20     |
| Transport & Mobile Machine                  | 1.27 | 0.74,2.20 | 0.39     |
